# Supplementary material
Source: publisher figshare collection journal article supplement (https://tandf.figshare.com/articles/dataset/_/12509606)
Supplement: Supplementary file 1 [file 1]

Archive with 2 entries (2 files):
- GCPI_A_1775822_Appendix References.pdf
- GCPI_A_1775822_Appendix Tables.pdf
