# Supplementary material
Source: publisher figshare collection journal article supplement (https://tandf.figshare.com/articles/dataset/_/12509606)
Supplement: Supplementary file 1 [file 1 › GCPI_A_1775822_Appendix References.pdf]

## APPENDIX: ADDITIONAL REFERENCES

- Aust MJ, Fagerlind H, Sagberg F. 2012. Fatal intersection crashes in Norway: Patterns in contributing factors and data collection challenges. *Accident Anal Prev.* 45:782-791.
- Beanland V, Fitzharris M, Young KL, Lenné MG. 2013. Driver inattention and driver distraction in serious casualty crashes: Data from the Australian National Crash In-depth Study. *Accident Anal Prev.* 54:99-107.
- Brodie L, Lyndal B, Elias IJ. 2009. Heavy vehicle driver fatalities: Learning's from fatal road crash investigations in Victoria. *Accident Anal Prev.* 41:557-564.
- Cestac J, Paran F, Delhomme P. 2011. Young drivers' sensation seeking, subjective norms, and perceived behavioral control and their roles in predicting speeding intention: How risk-taking motivations evolve with gender and driving experience. *Safety Science.* 49(3):424-432.
- Ellison AB, Bliemer MCJ, Greaves SP. 2015. Evaluating changes in driver behaviour: A risk profiling approach. *Accident Anal Prev.* 75:298-309.
- Fuller R, Bates H, Gormley M, Hannigan B, Stradling S, Broughton P, Kinnear N, O'Dolan C 2008. The Conditions for Inappropriate High Speed: A Review of the Research Literature from 1995 to 2006. Road Safety Research Report 92. London: Department for Transport.
- Høye A. 2017. Temaanalyse av dødsulykker på motorsykkel 2005-2014 – Tilleggsanalyser (Fatal accidents with motorcycles in Norway in 2005-2014 – Supplementary analyses). Working document. Oslo: Institute of Transport Economics.
- Knox D, Turner B, Silcock D, Beuret K, Metha J. 2003. Research into unlicensed driving. Road Safety Research Report No. 48. London: Department for Transport.
- Martin JL, Lenguerrand E. 2008. A population based estimation of the driver protection provided by passenger cars: France 1996–2005. *Accident Anal Prev.* 40(6):1811-1821.
- Montella A. 2009. Safety evaluation of curve delineation improvements: empirical Bayes observational before-and-after study. *Transportation Research Record.* 2103:69-79.
- Newstead S, Watson L, Cameron M. 2013. Vehicle Safety Ratings Estimated from Police Reported Crash Data: 2013 Update. Australian and New Zealand Crashes During 1987-2011. Report No. 318, Clayton: Monash University Accident Research Centre.
- Peck RC, Gebers MA, Voas RB, Romano E. 2008. The relationship between blood alcohol concentration (BAC), age, and crash risk. *J Safety Res.* 39(3):311-319.
- Shaffer HJ, Nelson SE, LaPlante DA, LaBrie RA, Albanese M, Caro G. 2007. The epidemiology of psychiatric disorders among repeat DUI offenders accepting a treatment-sentencing option. *J Consult Clin Psychol.* 75(5):795-804.
- Siskind V, Steinhardt D, Sheehan M, O'Connor T, Hanks H. 2011. Risk factors for fatal crashes in rural Australia. *Accident Anal Prev.* 43:1082-1088.

- Souleyrette P. 2010. Safety Analysis of Low-Volume Rural Roads in Iowa. Ames IA. Institute of Transportation, Iowa State University.
- Steptoe A, Wardle J, Fuller R, Davidsdottir S, Davou B, Justo J. 2002. Seat belt use, attitudes, and changes in legislation: an international study. *Am J Prev Med.* 23:254–259.
- Voas RB, Lacey JH, Jones K, Scherer M Compton R. 2013. Drinking drivers and drug use on weekend nights in the United States. *Drug Alcohol Depen.* 130(1–3):215-221.
- Yannis G, Papadimitriou E, Dupont E, Martensen H. 2010. Estimation of Fatality and Injury Risk by Means of In-Depth Fatal Accident Investigation Data. *Traffic Inj Prev.* 11:492-502.
- Yu JQ. 2014. Detect Me if You Can: Unlicensed Drivers and Road Safety in British Columbia. Simon Fraser University.
- Åberg L, Warner HW. 2008. Speeding - deliberate violation or involuntary mistake? *European Review of Applied Psychology.* 58:23-30.
