# Supplementary material
Source: publisher figshare collection journal article supplement (https://tandf.figshare.com/articles/dataset/_/12509606)
Supplement: Supplementary file 1 [file 1 › GCPI_A_1775822_Appendix Tables.pdf]

Table A.1: Percentages of passenger cars in fatal crashes in three speed groups and four DUI groups among whom each of the crash, driver, car, and road characteristics were present.

|                                           | N     | Speed            |                   |              | DUI              |                   |                  |          |
|-------------------------------------------|-------|------------------|-------------------|--------------|------------------|-------------------|------------------|----------|
|                                           |       | EXC <sup>1</sup> | INAP <sup>1</sup> | Not speeding | ALC <sup>1</sup> | DRUG <sup>1</sup> | MIX <sup>1</sup> | Sober    |
|                                           |       | (N=226)          | (N=354)           | (N=1369)     | (N=177)          | (N=66)            | (N=59)           | (N=1647) |
| <u>Crash</u>                              |       |                  |                   |              |                  |                   |                  |          |
| Single vehicle crash                      | 1 949 | 65 %             | 32 %              | 14 %         | 74 %             | 42 %              | 66 %             | 15 %     |
| Coll. with pedestrian/cyclist             | 1 949 | 4 %              | 17 %              | 12 %         | 8 %              | 8 %               | 3 %              | 12 %     |
| Fatality in own car, total                | 1 949 | 86 %             | 75 %              | 52 %         | 89 %             | 77 %              | 90 %             | 55 %     |
| Fatality in own car; crashes with partner | 1 471 |                  |                   |              |                  |                   |                  |          |
|                                           |       | 59 %             | 63 %              | 43 %         | 56 %             | 61 %              | 70 %             | 46 %     |
| Fatally injured; crash with partner       | 1 471 | 49 %             | 42 %              | 58 %         | 47 %             | 39 %              | 50 %             | 57 %     |
| Nighttime (6pm-6am)                       | 1 949 | 70 %             | 39 %              | 29 %         | 76 %             | 48 %              | 75 %             | 29 %     |
| Weekend (Sat.-Sun.)                       | 1 949 | 59 %             | 32 %              | 25 %         | 60 %             | 29 %              | 47 %             | 26 %     |
| Winter (November-March)                   | 1 949 | 23 %             | 53 %              | 42 %         | 33 %             | 33 %              | 31 %             | 43 %     |
| Slippery road                             | 1 942 | 7 %              | 40 %              | 21 %         | 11 %             | 15 %              | 11 %             | 24 %     |
| <u>Driver</u>                             |       |                  |                   |              |                  |                   |                  |          |
| EXC <sup>1</sup>                          | 1 949 | 100 %            | 0 %               | 0 %          | 42 %             | 24 %              | 36 %             | 7 %      |
| INAP <sup>1</sup>                         | 1 949 | 0 %              | 100 %             | 0 %          | 29 %             | 26 %              | 19 %             | 17 %     |
| ALC <sup>1</sup>                          | 1 949 | 33 %             | 14 %              | 4 %          | 100 %            | 0 %               | 0 %              | 0 %      |
| DRUG <sup>1</sup>                         | 1 949 | 7 %              | 5 %               | 2 %          | 0 %              | 100 %             | 0 %              | 0 %      |
| MIX <sup>1</sup>                          | 1 949 | 9 %              | 3 %               | 2 %          | 0 %              | 0 %               | 100 %            | 0 %      |
| Unlicensed driver                         | 1 716 | 17 %             | 10 %              | 5 %          | 20 %             | 35 %              | 37 %             | 2 %      |
| Unbelted driver, total                    | 1 949 | 43 %             | 26 %              | 14 %         | 52 %             | 39 %              | 61 %             | 14 %     |
| Unbelted driver, fatally injured          | 942   | 48 %             | 30 %              | 23 %         | 58 %             | 44 %              | 60 %             | 20 %     |
| Age (years; mean)                         | 1 926 | 26.9             | 37.7              | 46.4         | 31.5             | 37.7              | 30.4             | 44.0     |
| Male                                      | 1 930 | 95 %             | 85 %              | 73 %         | 94 %             | 83 %              | 92 %             | 76 %     |
| Young (< 25 years)                        | 1 926 | 58 %             | 33 %              | 16 %         | 45 %             | 15 %              | 32 %             | 22 %     |
| Tired/ill/suicidal                        | 1 949 | 14 %             | 17 %              | 24 %         | 14 %             | 23 %              | 19 %             | 22 %     |
| <u>Car</u>                                |       |                  |                   |              |                  |                   |                  |          |
| Old car (>10 years)                       | 1 909 | 70 %             | 60 %              | 40 %         | 73 %             | 70 %              | 66 %             | 44 %     |
| Electronic Stability Control              | 1 949 | 12 %             | 13 %              | 21 %         | 11 %             | 15 %              | 5 %              | 20 %     |
| <u>Road</u>                               |       |                  |                   |              |                  |                   |                  |          |
| Speed limit 80-110                        | 1 901 | 54 %             | 68 %              | 62 %         | 51 %             | 63 %              | 60 %             | 63 %     |
| Speed limit 30-50                         | 1 901 | 15 %             | 16 %              | 14 %         | 28 %             | 12 %              | 14 %             | 13 %     |
| Rural area                                | 1 949 | 85 %             | 85 %              | 84 %         | 84 %             | 86 %              | 86 %             | 84 %     |
| Traffic volume (AADT <sup>1</sup> )       | 1 753 | 5 986            | 4 286             | 6 534        | 4425             | 5333              | 6743             | 6237     |
| Crash site curve                          | 1 949 | 70 %             | 59 %              | 47 %         | 68 %             | 58 %              | 75 %             | 49 %     |

<sup>1</sup>EXC: Excessive speed; INAP: Inappropriate speed; ALC: Under the influence of alcohol; DRUG: Under the influence of drugs; MIX: Under the influence of alcohol and drugs; AADT: Annual Average Daily Traffic.

Table A.2: Unadjusted ORs with 95% confidence intervals (CI) from logistic regression with row variables as predictors and speed or DUI as dependent variables; statistically significant ORs in bold.

|                                                                            | EXC <sup>4</sup> (vs. not speeding) |                 | INAP <sup>4</sup> (vs. not speeding) |                | ALC <sup>4</sup> (vs. sober) |                  | DRUG <sup>4</sup> (vs. sober) |                  | MIX <sup>4</sup> (vs. sober) |                  |
|----------------------------------------------------------------------------|-------------------------------------|-----------------|--------------------------------------|----------------|------------------------------|------------------|-------------------------------|------------------|------------------------------|------------------|
|                                                                            | OR                                  | 95% CI          | OR                                   | 95% CI         | OR                           | 95% CI           | OR                            | 95% CI           | OR                           | 95% CI           |
| <b><i>Crash</i></b>                                                        |                                     |                 |                                      |                |                              |                  |                               |                  |                              |                  |
| Single vehicle crash (vs. other)                                           | <b>11.607</b>                       | (8.484; 15.88)  | <b>2.982</b>                         | (2.273; 3.913) | <b>16.142</b>                | (11.238; 23.185) | <b>4.176</b>                  | (2.517; 6.931)   | <b>11.053</b>                | (6.340; 19.268)  |
| Coll. with pedestrian/cyclist (vs. other)                                  | <b>0.281</b>                        | (0.136; 0.581)  | <b>1.564</b>                         | (1.132; 2.161) | 0.655                        | (0.378; 1.134)   | 0.580                         | (0.230; 1.46)    | 0.248                        | (0.060; 1.024)   |
| Fatality in own car (vs. no fatality in own car)                           | <b>5.611</b>                        | (3.804; 8.276)  | <b>2.840</b>                         | (2.181; 3.699) | <b>6.735</b>                 | (4.144; 10.947)  | <b>2.754</b>                  | (1.536; 4.937)   | <b>7.154</b>                 | (3.058; 16.735)  |
| Fatality in own car (vs. no fatality in own car) <sup>1</sup>              | <b>1.880</b>                        | (1.18; 2.996)   | <b>2.180</b>                         | (1.631; 2.914) | 1.471                        | (0.798; 2.71)    | 1.785                         | (0.924; 3.451)   | <b>2.717</b>                 | (1.038; 7.111)   |
| Fatally injured crash partner (vs. no crash partner fatality) <sup>1</sup> | 0.684                               | (0.432; 1.082)  | <b>0.527</b>                         | (0.396; 0.7)   | 0.686                        | (0.373; 1.26)    | <b>0.514</b>                  | (0.266; 0.994)   | 0.789                        | (0.326; 1.907)   |
| Nighttime (6pm-6am) (vs. daytime)                                          | <b>5.770</b>                        | (4.243; 7.847)  | <b>1.568</b>                         | (1.229; 2.001) | <b>7.621</b>                 | (5.319; 10.92)   | <b>2.302</b>                  | (1.404; 3.773)   | <b>7.174</b>                 | (3.954; 13.014)  |
| Weekend (Sat.-Sun.) (vs. other day)                                        | <b>4.345</b>                        | (3.245; 5.818)  | <b>1.462</b>                         | (1.134; 1.885) | <b>4.173</b>                 | (3.03; 5.746)    | 1.130                         | (0.656; 1.947)   | <b>2.524</b>                 | (1.497; 4.257)   |
| Winter (November-March) (vs. summer)                                       | <b>0.415</b>                        | (0.299; 0.576)  | <b>1.591</b>                         | (1.258; 2.012) | <b>0.634</b>                 | (0.456; 0.88)    | 0.650                         | (0.386; 1.095)   | 0.571                        | (0.325; 1.002)   |
| Slippery road (vs. not slippery)                                           | <b>0.277</b>                        | (0.161; 0.476)  | <b>2.580</b>                         | (2.009; 3.314) | <b>0.395</b>                 | (0.244; 0.637)   | 0.563                         | (0.284; 1.115)   | <b>0.364</b>                 | (0.155; 0.855)   |
| <b><i>Driver</i></b>                                                       |                                     |                 |                                      |                |                              |                  |                               |                  |                              |                  |
| EXC (vs. not speeding)                                                     |                                     |                 |                                      |                | <b>15.555</b>                | (10.398; 23.27)  | <b>5.300</b>                  | (2.831; 9.919)   | <b>8.501</b>                 | (4.659; 15.512)  |
| INAP (vs. not speeding)                                                    |                                     |                 |                                      |                | <b>4.483</b>                 | (2.982; 6.74)    | <b>2.355</b>                  | (1.293; 4.288)   | 1.862                        | (0.913; 3.800)   |
| ALC (vs. sober)                                                            | <b>15.555</b>                       | (10.398; 23.27) | <b>4.483</b>                         | (2.982; 6.74)  |                              |                  |                               |                  |                              |                  |
| DRUG (vs. sober)                                                           | <b>5.300</b>                        | (2.831; 9.919)  | <b>2.355</b>                         | (1.293; 4.288) |                              |                  |                               |                  |                              |                  |
| MIX (vs. sober)                                                            | <b>8.501</b>                        | (4.659; 15.512) | 1.862                                | (0.913; 3.8)   |                              |                  |                               |                  |                              |                  |
| Unlicensed driver (vs. licensed)                                           | <b>4.206</b>                        | (2.667; 6.633)  | <b>2.421</b>                         | (1.545; 3.795) | <b>9.665</b>                 | (5.962; 15.669)  | <b>20.638</b>                 | (11.284; 37.747) | <b>24.198</b>                | (12.908; 45.365) |
| Unbelted driver (vs. belted)                                               | <b>4.839</b>                        | (3.567; 6.565)  | <b>2.252</b>                         | (1.698; 2.988) | <b>6.876</b>                 | (4.959; 9.534)   | <b>4.129</b>                  | (2.471; 6.900)   | <b>9.943</b>                 | (5.784; 17.094)  |
| Unbelted driver (vs. belted) <sup>3</sup>                                  | <b>3.124</b>                        | (2.164; 4.51)   | <b>1.479</b>                         | (1.036; 2.112) | <b>5.328</b>                 | (3.628; 7.824)   | <b>3.061</b>                  | (1.610; 5.822)   | <b>5.752</b>                 | (3.026; 10.933)  |
| Male (vs. female)                                                          | <b>6.146</b>                        | (3.393; 11.133) | <b>1.957</b>                         | (1.426; 2.686) | <b>4.658</b>                 | (2.504; 8.667)   | 1.543                         | (0.800; 2.978)   | <b>3.334</b>                 | (1.324; 8.393)   |
| Young (< 25 years) (vs. older)                                             | <b>7.245</b>                        | (5.355; 9.801)  | <b>2.647</b>                         | (2.031; 3.45)  | <b>2.970</b>                 | (2.159; 4.084)   | 0.643                         | (0.325; 1.273)   | 1.710                        | (0.978; 2.99)    |
| Tired/ill/suicidal (vs. other)                                             | <b>0.526</b>                        | (0.354; 0.779)  | <b>0.650</b>                         | (0.48; 0.882)  | <b>0.572</b>                 | (0.369; 0.886)   | 1.022                         | (0.568; 1.839)   | 0.796                        | (0.409; 1.549)   |
| <b><i>Car</i></b>                                                          |                                     |                 |                                      |                |                              |                  |                               |                  |                              |                  |
| Old car (>10 years) (vs. newer car)                                        | <b>3.759</b>                        | (2.748; 5.142)  | <b>2.293</b>                         | (1.803; 2.918) | <b>3.446</b>                 | (2.43; 4.888)    | <b>3.069</b>                  | (1.779; 5.294)   | <b>2.527</b>                 | (1.461; 4.371)   |
| ESC (vs. no ESC)                                                           | <b>0.524</b>                        | (0.345; 0.794)  | <b>0.567</b>                         | (0.406; 0.791) | <b>0.503</b>                 | (0.311; 0.813)   | 0.705                         | (0.356; 1.396)   | <b>0.211</b>                 | (0.066; 0.680)   |
| <b><i>Road</i></b>                                                         |                                     |                 |                                      |                |                              |                  |                               |                  |                              |                  |
| Speed limit 80-110 (vs. lower)                                             | <b>0.742</b>                        | (0.558; 0.987)  | <b>1.312</b>                         | (1.022; 1.684) | <b>0.601</b>                 | (0.438; 0.824)   | 1.003                         | (0.006; 1.676)   | 0.893                        | (0.523; 1.526)   |
| Speed limit 30-50 (vs. higher)                                             | 1.094                               | (0.732; 1.634)  | 1.199                                | (0.866; 1.661) | <b>2.616</b>                 | (1.818; 3.764)   | 0.949                         | (0.446; 2.017)   | 1.081                        | (0.505; 2.313)   |
| Rural area (vs. other)                                                     | 1.056                               | (0.717; 1.557)  | 1.099                                | (0.794; 1.522) | 0.974                        | (0.641; 1.482)   | 1.209                         | (0.591; 2.472)   | 1.217                        | (0.571; 2.594)   |
| Crash site curve (vs. other)                                               | <b>2.578</b>                        | (1.903; 3.491)  | <b>1.618</b>                         | (1.276; 2.051) | <b>2.211</b>                 | (1.588; 3.079)   | 1.389                         | (0.844; 2.284)   | <b>3.002</b>                 | (1.657; 5.436)   |

<sup>1</sup> Only crashes with crash partner. <sup>2</sup> Friday 6pm to Saturday 6 am and Saturday 6pm to Sunday 6am. <sup>3</sup> Only fatally injured drivers. <sup>4</sup>EXC: Excessive speed; INAP: Inappropriate speed; ALC: Under the influence of alcohol; DRUG: Under the influence of drugs; MIX: Under the influence of alcohol and drugs.

Table A.3: Adjusted ORs with 95% confidence intervals (CI) from multiple logistic regression with row variables as predictors and speed or DUI as dependent variables; statistically significant ORs in bold; model characteristics (N and Pseudo R2) in the bottom rows.

|                                     | EXC <sup>4</sup> (vs. not speeding) |                 | INAP <sup>4</sup> (vs. not speeding) |                | ALC <sup>4</sup> (vs. sober) |                | DRUG <sup>4</sup> (vs. sober) |                 | MIX <sup>4</sup> (vs. sober) |                  |
|-------------------------------------|-------------------------------------|-----------------|--------------------------------------|----------------|------------------------------|----------------|-------------------------------|-----------------|------------------------------|------------------|
|                                     | OR                                  | 95% CI          | OR                                   | 95% CI         | OR                           | 95% CI         | OR                            | 95% CI          | OR                           | 95% CI           |
| <b><u>Driver</u></b>                |                                     |                 |                                      |                |                              |                |                               |                 |                              |                  |
| EXC (vs. other)                     |                                     |                 |                                      |                | <b>8.041</b>                 | (4.840; 13.36) | <b>4.822</b>                  | (2.009; 11.571) | <b>6.117</b>                 | (2.703; 13.844)  |
| INAP (vs. other)                    |                                     |                 |                                      |                | <b>3.043</b>                 | (1.895; 4.888) | <b>2.088</b>                  | (1.051; 4.146)  | 0.773                        | (0.306; 1.954)   |
| ALC (vs. other)                     | <b>8.769</b>                        | (5.213; 14.751) | <b>2.866</b>                         | (1.782; 4.61)  |                              |                |                               |                 |                              |                  |
| DRUG (vs. other)                    | <b>4.248</b>                        | (1.895; 9.521)  | <b>1.974</b>                         | (1.015; 3.842) |                              |                |                               |                 |                              |                  |
| MIX (vs. other)                     | <b>5.745</b>                        | (2.649; 12.46)  | 0.927                                | (0.386; 2.224) |                              |                |                               |                 |                              |                  |
| Unlicensed driver (vs. licensed)    | 1.164                               | (0.638; 2.123)  | 1.300                                | (0.757; 2.234) | <b>5.507</b>                 | (3.118; 9.728) | <b>17.952</b>                 | (8.957; 35.977) | <b>21.442</b>                | (10.240; 44.898) |
| Unbelted driver (vs. belted)        | <b>1.749</b>                        | (1.151; 2.657)  | 1.342                                | (0.957; 1.883) | <b>3.546</b>                 | (2.400; 5.240) | <b>2.482</b>                  | (1.314; 4.687)  | <b>7.059</b>                 | (3.610; 13.804)  |
| Male (vs. female)                   | <b>4.499</b>                        | (2.317; 8.738)  | <b>1.799</b>                         | (1.284; 2.522) | <b>2.267</b>                 | (1.152; 4.464) | 0.899                         | (0.435; 1.856)  | 1.867                        | (0.669; 5.209)   |
| Young (< 25 years) (vs. older)      | <b>6.631</b>                        | (4.536; 9.696)  | <b>2.214</b>                         | (1.651; 2.969) | 0.977                        | (0.640; 1.493) | <b>0.144</b>                  | (0.056; 0.368)  | <b>0.377</b>                 | (0.168; 0.848)   |
| Tired/ill/suicidal (vs. other)      | <b>0.515</b>                        | (0.307; 0.862)  | 0.725                                | (0.522; 1.006) | 0.776                        | (0.466; 1.294) | 0.917                         | (0.458; 1.838)  | 0.804                        | (0.360; 1.799)   |
| <b><u>Car</u></b>                   |                                     |                 |                                      |                |                              |                |                               |                 |                              |                  |
| Old car (>10 years) (vs. newer car) | <b>2.174</b>                        | (1.427; 3.31)   | <b>1.974</b>                         | (1.015; 3.842) | <b>1.810</b>                 | (1.154; 2.839) | <b>2.558</b>                  | (1.306; 5.013)  | 1.042                        | (0.516; 2.103)   |
| ESC (vs. no ESC)                    | 1.239                               | (0.701; 2.19)   | 0.927                                | (0.386; 2.224) | 1.147                        | (0.633; 2.079) | 1.560                         | (0.670; 3.633)  | 0.299                        | (0.082; 1.093)   |
| <b><u>Model characteristics</u></b> |                                     |                 |                                      |                |                              |                |                               |                 |                              |                  |
| N of observations                   | 1364                                |                 | 1486                                 |                | 1579                         |                | 1479                          |                 | 1472                         |                  |
| Pseudo R-square <sup>5</sup>        | 0.331                               |                 | 0.085                                |                | 0.268                        |                | 0.230                         |                 | 0.326                        |                  |

<sup>1</sup> Only crashes with crash partner. <sup>2</sup> Friday 6pm to Saturday 6 am and Saturday 6pm to Sunday 6am. <sup>3</sup> Only fatally injured drivers. <sup>4</sup>EXC: Excessive speed; INAP: Inappropriate speed; ALC: Under the influence of alcohol; DRUG: Under the influence of drugs; MIX: Under the influence of alcohol and drugs. <sup>5</sup>Pseudo R-square indicates the proportion of variance in the dependent variable that is explained by the predictor variables.
